# Supplementary material for: The Relationship between Family Violence and Self-Control in Adolescence: A Multi-Level Meta-Analysis
Source: Preprints.org preprint supplement (doi:10.20944/preprints201809.0328.v1), 2018-09-18
Supplement: Supplementary file 1 [file supplementary]

## Sheet: Blad1
Study_ID	Author	PubYear	Journal	Ind_dep	Country	Hofstede_indiv	Hofstede_power	Hofstede_masculinity	Study_ID_2	Sample_name	Ethnicity	Ethn_cat	N_es	ES_design	ES_direction_new	ES_dum_cross	ES_dum_long_p	Age	Age_cent10	Age_cent10_sq	time_delay_new	Parenting	Parenting_items	concept conflict	Informant_parenting	Meaning_scores_parenting	Alpha_parenting	term_sc	informant_sc	meaning_sc	alpha_sc	ES_ID	ES_gender_parents	ES_gender_child	ES_raw	ES_rec	ES_trans	ES_cons	ES_cons_dum1	ES_cons_dum2	ES_meaning	ES_table	ES_page	ES_count	ES_fisher	ES_VAR
9	Agbaria, Hamama, Orkibi	2016	Child Indicators Research	0	Israel	54	13	47	9		Israeli Arab	5	155	1	0	1	0	16.21	6.21	38.5641	0	Exposure to Parent-Child aggression	Parent-child Conflict tactics Scale (Straus et al. 1998)	conflict tactics scale "mostly used scale for family violence"	1	Higher score higher frequency of severe physically violent assault by parents toward the repondent during the last year	0.84	Self-Control Skills	1	high scores high self-control	0.72	5	3	3	-0.03	2	-0.03	1	1	0	more conflict, less self-control	1	795	1	-0.030009	0.00657895
93	Bradley, Corwyn	2007	Developmental Psychology	0	USA	91	40	62	1011	NICHD Study of Early Child Care and Youth Development (SECCYD)	81.2% European American, 12.0% African American, 6.8% other	2	1017	1	0	1	0	10.5	0.5	0.25	0	harshness (includes expressions of anger and annoyance, physical punishment, and intrusiveness, and conceptually similar to the corporal punishment measure by Jaffee et al., 2004)	the Home Observation for Measurement of the Environment (HOME) Inventory	includes expressions of anger and annoyance, physical punishment, and intrusiveness, and conceptually similar to the corporal punishment measure		more harshness	> .90 (interrater agreement)	self-control	2	higher sc	.82 to .87	61	3	1	0.17	1	-0.17	2	0	1	more harshness, higher sc	T1	p.1396	1	-0.171667	0.000986193
93	Bradley, Corwyn	2007	Developmental Psychology		USA	91	40	62	1011	NICHD Study of Early Child Care and Youth Development (SECCYD)	81.2% European American, 12.0% African American, 6.8% other	2	927	1	0	1	0	10.5	0.5	0.25	0	harshness (includes expressions of anger and annoyance, physical punishment, and intrusiveness, and conceptually similar to the corporal punishment measure by Jaffee et al., 2004)	the Home Observation for Measurement of the Environment (HOME) Inventory			more harshness	> .90 (interrater agreement)	self-control	2	higher sc	.82 to .87	71	3	1	0.17	1	-0.17	2	0	1	more harshness, higher sc	T1	p.1396	1	-0.171667	0.00108225
101	Brody, Ge	2001	Journal of Family Psychology	0	USA	91	40	62	101		Caucasian	2	120	1	0	1	0	11	1	1	0	father's harsh-conflicted parenting (children's answer on how often discussion with each parent regarding alcohol use, religion, school, and prosocial behavior are characterized by conflict and parents' answer how often they disciplined using tactics such as spanking, slapping, or hiting with a belt)	chidlrens' answered the Family process scale (Brody et al., 1999) and parents' answered the physical punishment subscale of the Conflict Tactics Scale (Straus, 1979)	children's answer on how often discussion with each parent regarding alcohol use, religion, school, and prosocial behavior are characterized by conflict and parents' answer how often they disciplined using tactics such as spanking, slapping, or hiting with a belt	3	more harsh-conflicted parenting	chidlren's answer was .73 and .83 for mother and father respectively and .95 for mothers and .93 for fathers	self-control	2	higher sc	> .90	85	2	1	-0.39	2	-0.39	2	0	1	more wave 1 father harsh-conflicted parenting, less wave 1 sc	T1	p.94	1	-0.4118	0.00854701
101	Brody, Ge	2001	Journal of Family Psychology		USA	91	40	62	101		Caucasian	2	120	1	0	1	0	11	1	1	0	mother's harsh-conflicted parenting (children's answer on how often discussion with each parent regarding alcohol use, religion, school, and prosocial behavior are characterized by conflict and parents' answer how often they disciplined using tactics such as spanking, slapping, or hiting with a belt)	chidlrens' answered the Family process scale (Brody et al., 1999) and parents' answered the physical punishment subscale of the Conflict Tactics Scale (Straus, 1979)		3	more harsh-conflicted parenting	chidlren's answer was .73 and .83 for mother and father respectively and .95 for mothers and .93 for fathers	self-control	2	higher sc	> .90	86	1	1	-0.3	2	-0.3	2	0	1	more wave 1 mother harsh-conflicted parenting, less wave1 sc	T1	p.94	1	-0.30952	0.00854701
101	Brody, Ge	2001	Journal of Family Psychology		USA	91	40	62	101		Caucasian	2	120	1	0	1	0	11	1	1	0	father's harsh-conflicted parenting (children's answer on how often discussion with each parent regarding alcohol use, religion, school, and prosocial behavior are characterized by conflict and parents' answer how often they disciplined using tactics such as spanking, slapping, or hiting with a belt)	chidlrens' answered the Family process scale (Brody et al., 1999) and parents' answered the physical punishment subscale of the Conflict Tactics Scale (Straus, 1979)		3	more harsh-conflicted parenting	chidlren's answer was .73 and .83 for mother and father respectively and .95 for mothers and .93 for fathers	self-control	2	lower sc	> .90	89	2	1	0.29	1	-0.29	2	0	1	more wave 1 father harsh-conflicted parenting, less wave 1 sc (more wave1 lack of sc)	T1	p.94	1	-0.298566	0.00854701
101	Brody, Ge	2001	Journal of Family Psychology		USA	91	40	62	101		Caucasian	2	120	1	0	1	0	11	1	1	0	mother's harsh-conflicted parenting (children's answer on how often discussion with each parent regarding alcohol use, religion, school, and prosocial behavior are characterized by conflict and parents' answer how often they disciplined using tactics such as spanking, slapping, or hiting with a belt)	chidlrens' answered the Family process scale (Brody et al., 1999) and parents' answered the physical punishment subscale of the Conflict Tactics Scale (Straus, 1979)		3	more harsh-conflicted parenting	chidlren's answer was .73 and .83 for mother and father respectively and .95 for mothers and .93 for fathers	self-control	2	lower sc	> .90	90	1	1	0.37	1	-0.37	2	0	1	more wave 1 mother harsh-conflicted parenting, less wave 1 sc (more wave 1 lack sc)	T1	p.94	1	-0.388423	0.00854701
101	Brody, Ge	2001	Journal of Family Psychology		USA	91	40	62	101		Caucasian	2	120	1	0	1	0	12	2	4	0	father's harsh-conflicted parenting (children's answer on how often discussion with each parent regarding alcohol use, religion, school, and prosocial behavior are characterized by conflict and parents' answer how often they disciplined using tactics such as spanking, slapping, or hiting with a belt)	chidlrens' answered the Family process scale (Brody et al., 1999) and parents' answered the physical punishment subscale of the Conflict Tactics Scale (Straus, 1979)		3	more harsh-conflicted parenting	chidlren's answer was .73 and .83 for mother and father respectively and .95 for mothers and .93 for fathers	self-control	2	higher sc	> .90	93	2	1	-0.33	2	-0.33	2	0	1	more wave 2 father harsh-conflicted parenting, less wave 2 sc	T1	p.94	1	-0.342828	0.00854701
101	Brody, Ge	2001	Journal of Family Psychology		USA	91	40	62	101		Caucasian	2	120	1	0	1	0	12	2	4	0	mother's harsh-conflicted parenting (children's answer on how often discussion with each parent regarding alcohol use, religion, school, and prosocial behavior are characterized by conflict and parents' answer how often they disciplined using tactics such as spanking, slapping, or hiting with a belt)	chidlrens' answered the Family process scale (Brody et al., 1999) and parents' answered the physical punishment subscale of the Conflict Tactics Scale (Straus, 1979)		3	more harsh-conflicted parenting	chidlren's answer was .73 and .83 for mother and father respectively and .95 for mothers and .93 for fathers	self-control	2	higher sc	> .90	94	1	1	-0.39	2	-0.39	2	0	1	more wave 2 mother harsh-conflicted parenting, less wave 2 sc	T1	p.94	1	-0.4118	0.00854701
101	Brody, Ge	2001	Journal of Family Psychology		USA	91	40	62	101		Caucasian	2	120	1	0	1	0	12	2	4	0	father's harsh-conflicted parenting (children's answer on how often discussion with each parent regarding alcohol use, religion, school, and prosocial behavior are characterized by conflict and parents' answer how often they disciplined using tactics such as spanking, slapping, or hiting with a belt)	chidlrens' answered the Family process scale (Brody et al., 1999) and parents' answered the physical punishment subscale of the Conflict Tactics Scale (Straus, 1979)		3	more harsh-conflicted parenting	chidlren's answer was .73 and .83 for mother and father respectively and .95 for mothers and .93 for fathers	self-control	2	lower sc	> .90	97	2	1	0.27	1	-0.27	2	0	1	more wave 2 father harsh-conflicted parenting, less wave 2 sc (more wave 2 lack of sc)	T1	p.94	1	-0.276864	0.00854701
101	Brody, Ge	2001	Journal of Family Psychology		USA	91	40	62	101		Caucasian	2	120	1	0	1	0	12	2	4	0	mother's harsh-conflicted parenting (children's answer on how often discussion with each parent regarding alcohol use, religion, school, and prosocial behavior are characterized by conflict and parents' answer how often they disciplined using tactics such as spanking, slapping, or hiting with a belt)	chidlrens' answered the Family process scale (Brody et al., 1999) and parents' answered the physical punishment subscale of the Conflict Tactics Scale (Straus, 1979)		3	more harsh-conflicted parenting	chidlren's answer was .73 and .83 for mother and father respectively and .95 for mothers and .93 for fathers	self-control	2	lower sc	> .90	98	1	1	0.34	1	-0.34	2	0	1	more wave 2 mother harsh-conflicted parenting, less wave 2 sc (more wave 2 lack sc)	T1	p.94	1	-0.354093	0.00854701
101	Brody, Ge	2001	Journal of Family Psychology		USA	91	40	62	101		Caucasian	2	120	2	1	0	1	12	2	4	1	father's harsh-conflicted parenting (children's answer on how often discussion with each parent regarding alcohol use, religion, school, and prosocial behavior are characterized by conflict and parents' answer how often they disciplined using tactics such as spanking, slapping, or hiting with a belt)	chidlrens' answered the Family process scale (Brody et al., 1999) and parents' answered the physical punishment subscale of the Conflict Tactics Scale (Straus, 1979)		3	more harsh-conflicted parenting	chidlren's answer was .73 and .83 for mother and father respectively and .95 for mothers and .93 for fathers	self-control	2	higher sc	> .90	101	2	1	-0.29	2	-0.29	2	0	1	more wave 1 father harsh-conflicted parenting, less wave 2 sc	T1	p.94	1	-0.298566	0.00854701
101	Brody, Ge	2001	Journal of Family Psychology		USA	91	40	62	101		Caucasian	2	120	2	1	0	1	12	2	4	1	mother's harsh-conflicted parenting (children's answer on how often discussion with each parent regarding alcohol use, religion, school, and prosocial behavior are characterized by conflict and parents' answer how often they disciplined using tactics such as spanking, slapping, or hiting with a belt)	chidlrens' answered the Family process scale (Brody et al., 1999) and parents' answered the physical punishment subscale of the Conflict Tactics Scale (Straus, 1979)		3	more harsh-conflicted parenting	chidlren's answer was .73 and .83 for mother and father respectively and .95 for mothers and .93 for fathers	self-control	2	higher sc	> .90	102	1	1	-0.2	2	-0.2	2	0	1	more wave 1 mother harsh-conflicted parenting, less wave 2 sc	T1	p.94	1	-0.202733	0.00854701
101	Brody, Ge	2001	Journal of Family Psychology		USA	91	40	62	101		Caucasian	2	120	2	1	0	1	12	2	4	1	father's harsh-conflicted parenting (children's answer on how often discussion with each parent regarding alcohol use, religion, school, and prosocial behavior are characterized by conflict and parents' answer how often they disciplined using tactics such as spanking, slapping, or hiting with a belt)	chidlrens' answered the Family process scale (Brody et al., 1999) and parents' answered the physical punishment subscale of the Conflict Tactics Scale (Straus, 1979)		3	more harsh-conflicted parenting	chidlren's answer was .73 and .83 for mother and father respectively and .95 for mothers and .93 for fathers	self-control	2	lower sc	> .90	105	2	1	0.28	1	-0.28	2	0	1	more wave 1 father harsh-conflicted parenting, less wave 2 sc (more wave 2 lack of sc)	T1	p.94	1	-0.287682	0.00854701
101	Brody, Ge	2001	Journal of Family Psychology		USA	91	40	62	101		Caucasian	2	120	2	1	0	1	12	2	4	1	mother's harsh-conflicted parenting (children's answer on how often discussion with each parent regarding alcohol use, religion, school, and prosocial behavior are characterized by conflict and parents' answer how often they disciplined using tactics such as spanking, slapping, or hiting with a belt)	chidlrens' answered the Family process scale (Brody et al., 1999) and parents' answered the physical punishment subscale of the Conflict Tactics Scale (Straus, 1979)		3	more harsh-conflicted parenting	chidlren's answer was .73 and .83 for mother and father respectively and .95 for mothers and .93 for fathers	self-control	2	lower sc	> .90	106	1	1	0.17	1	-0.17	2	0	1	more wave 1 mother harsh-conflicted parenting, less wave 2 sc (more wave 2 lack sc)	T1	p.94	1	-0.171667	0.00854701
146	Cheung & Cheung	2008	Journal of Youth and Adolescence	0	Hong Kong	25	68	57	1001	‘‘Northbound Pleasures: Pattern of Cross-Border Deviance of Hong Kong Marginal Youths and Its Implications for Adolescent Deviance in Hong Kong,’’		4	1015	1	0	1	0	16	6	36	0	Strain: Coercive parenting	through two items asking the participant how often his/her parents had yelled at him/her and how often he/she had been physically punished or treated with force by his/her parents	Coercion	1	more coercive parenting	0.56	self-control	1	high scores more self-control	0.61	158	3	1	-0.184	2	-0.184	1	1	0	more coercive parenting less self-control	3	423	1	-0.18612	0.000988142
147	Cheung, Cheung	2010	Sociological Perspectives	1	Hong Kong	25	68	57	1001	‘‘Northbound Pleasures: Pattern of Cross-Border Deviance of Hong Kong Marginal Youths and Its Implications for Adolescent Deviance in Hong Kong,’’	Asian	4	1015	1	0	1	0	16	6	36	0	coercive parenting	2 items to ask how often the participants' parents yelled at him/her and how often he/she was physically punished or treated with force by his/her parents	Coercion	1	more coercive parenting	0.56	low self-control	1	high self-control	0.61	160	3	1	-0.216	2	-0.216	1	1	0	more coercive parenting less sc	T3	p.333	1	-0.219457	0.000988142
219	Evans, Simons, Simons	2012	Journal of Youth and Adolescence	0	USA	91	40	62	1017	the Family andCommunity Health Study (FACHS)	African American	3	418	1	0	1	0	14.5	4.5	20.25	0	Verbal Abuse	how frequently(1=never; 4=always) when interacting with their pri-mary caregiver that this person becomes angry, shouts,yells, insults and swears, and threatens physical harm	when interacting with their pri-mary caregiver that this person becomes angry, shouts,yells, insults and swears, and threatens physical harm	1	more abuse	0.77	low self-control	1	higher score lower self-control	0.73	373	3	3	0.2977	1	-0.2977	1	1	0	more verbal abuse more low self -control	1	1102	1	-0.306994	0.00240964
219	Evans, Simons, Simons	2012	Journal of Youth and Adolescence		USA	91	40	62	1017	the Family andCommunity Health Study (FACHS)	African American	3	418	1	0	1	0	14.5	4.5	20.25	0	Corporal Punishment	often (1=never; 4=always) that their primary caregiverdisciplines them by slapping or striking with an objec		1	more punishment	0.70	low self-control	1	higher score lower self-control	0.73	374	3	3	-0.0166	1	0.0166	1	1	0	more corporal punishment LESS low self-control	1	1102	1	0.0166015	0.00240964
219	Evans, Simons, Simons	2012	Journal of Youth and Adolescence		USA	91	40	62	1017	the Family andCommunity Health Study (FACHS)	African American	3	361	1	0	1	0	14.5	4.5	20.25	0	Verbal Abuse	how frequently(1=never; 4=always) when interacting with their pri-mary caregiver that this person becomes angry, shouts,yells, insults and swears, and threatens physical harm		1	more abuse	0.77	low self-control	1	higher score lower self-control	0.73	377	3	2	0.3422	1	-0.3422	1	1	0	more verbal abuse more low self -control	1	1102	1	-0.356582	0.0027933
219	Evans, Simons, Simons	2012	Journal of Youth and Adolescence		USA	91	40	62	1017	the Family andCommunity Health Study (FACHS)	African American	3	361	1	0	1	0	14.5	4.5	20.25	0	Corporal Punishment	often (1=never; 4=always) that their primary caregiverdisciplines them by slapping or striking with an objec		1	more punishment	0.70	low self-control	1	higher score lower self-control	0.73	378	3	2	0.1663	1	-0.1663	1	1	0	more corporal punishment more low self-control	1	1102	1	-0.167859	0.0027933
227	Feldman, Wentzel	1990	Journal of Educational Psychology	0	USA	91	40	62	227				65	1	0	1	0	11.5	1.5	2.25	0	father-son hostility (hostility refers to open hostility, sarcasm, put-downs, or mocking)	interaction task	hostility refers to open hostility, sarcasm, put-downs, or mocking		more hostility between father and son		restraint	3	better self-restraint	.87 for teacher-report and .85 for peer-report	389	2	2	-0.27	2	-0.27	2	0	1	more father-son hostility, lower the son's restraint	Table 1	p.816	1	-0.276864	0.016129
227	Feldman, Wentzel	1990	Journal of Educational Psychology		USA	91	40	62	227				65	1	0	1	0	11.5	1.5	2.25	0	mother-son hostility (hostility refers to open hostility, sarcasm, put-downs, or mocking)	interaction task	hostility refers to open hostility, sarcasm, put-downs, or mocking		more hostility between mother and son		restraint	3	better self-restraint	.87 for teacher-report and .85 for peer-report	390	3	2	-0.16	2	-0.16	2	0	1	more mother-son hostility, lower the son's restraint	Table 1	p.816	1	-0.161387	0.016129
228	Feldman, Wentzel	1990	Journal of Early Adolescence	0	USA	91	40	62	228		73% of families were White	2	92	1	0	1	0	11.5	1.5	2.25	0	harsh discipline	7 items from the Weinberger Parenting Inventory (Weinberger et al., 1989) were used to assess parents' use of authoritarian and punitive disciplinary techniques such as "I slap or spank him when he does something wrong" and "I make sure his punishments are unpleasant enough that he will remember them for a long time"	"I slap or spank him when he does something wrong" and "I make sure his punishments are unpleasant enough that he will remember them for a long time"	2	more often use of harsh discipline	0.75	self-restraint	2	better self-restraint	0.87	392	1	2	-0.38	2	-0.38	2	0	1	the more mother-report harsh discipline, the less teacher-report self-restrait	Table 1	p. 446	1	-0.40006	0.011236
228	Feldman, Wentzel	1990	Journal of Early Adolescence		USA	91	40	62	228		73% of families were White	2	67	1	0	1	0	11.5	1.5	2.25	0	harsh discipline	7 items from the Weinberger Parenting Inventory (Weinberger et al., 1989) were used to assess parents' use of authoritarian and punitive disciplinary techniques such as "I slap or spank him when he does something wrong" and "I make sure his punishments are unpleasant enough that he will remember them for a long time"		2	more often use of harsh discipline	0.75	self-restraint	2	better self-restraint	0.87	395	2	2	-0.28	2	-0.28	2	0	1	the more father-report harsh discipline, the less teacher-report self-restrait	Table 1	p. 446	1	-0.287682	0.015625
239	Fosco, Grych	2012	Journal of Family Issues	0	USA	91	40	62	239		55.0% Caucasian, 28.2% African American, 6% Latino, 1.3% Asian, 0.7 Native American, 6.7% Biracial, 2.2% Other	1	150	1	0	1	0	10	0	0	0	interparental conflict	a single index created from child (Children's perceptions of interparental conflict questionnaire, Grych, Seid, & Finchman, 1992), mother & father (parents report on conflict and problem-solving scale, Kerig, 1996), and observed assessment (obsveration of marital communication, Lindahl & Malik, 2000)	poorer communication, including defensiveness, anger, and disrespect,	3	more intraparental conflict	.87 for child, .90 for mothers, .91 for fathers, .91 for observed measure (intraclass r)	anger regulation, measuring the frequency, intesity and ability to appropriately manage and express angry feelings	1	more adaptive functioning (better sad regulation)	0.79	408	3	1	-0.22	2	-0.22	2	0	1	the more interparental conflict, the poor sad regulaiton	Table 1	p. 568	1	-0.223656	0.00680272
274	Hallquist, Hipwell, Stepp	2015	Journal of Abnormal Psychology	0	USA	91	40	62	274		39.2% reported a primary as Caucasian, 60.2% with minority race	1	2228	1	0	1	0	10	0	0	0	harsh punishment	caregiver and child reports on the Conflict Tactics Scale: Parent-Child version (CTSPC; Straus et al., 1998)	conflict tactics scale "mostly used scale for family violence"	3	more harsh punishment	average .74 (from .69 to .77)	poor self-control	3	poorer self-control	.77 for child report (from .74 to .80) and .82 for caregiver report (from .80 to .83)	427	3	3	0.23	1	-0.23	1	1	0	the more punishment at 10 yrs, the less sc at 10 yrs	Table 2	p. 24	1	-0.234189	0.000449438
274	Hallquist, Hipwell, Stepp	2015	Journal of Abnormal Psychology		USA	91	40	62	274		39.2% reported a primary as Caucasian, 60.2% with minority race	1	2228	2	1	0	1	11	1	1	1	harsh punishment	caregiver and child reports on the Conflict Tactics Scale: Parent-Child version (CTSPC; Straus et al., 1998)		3	more harsh punishment	average .74 (from .69 to .77)	poor self-control	3	poorer self-control	.77 for child report (from .74 to .80) and .82 for caregiver report (from .80 to .88)	428	3	3	0.18	1	-0.18	1	1	0	the more punishment at 10 yrs, the less sc at 11 yrs	Table 2	p. 24	1	-0.181983	0.000449438
274	Hallquist, Hipwell, Stepp	2015	Journal of Abnormal Psychology		USA	91	40	62	274		39.2% reported a primary as Caucasian, 60.2% with minority race	1	2228	1	0	1	0	11	1	1	0	harsh punishment	caregiver and child reports on the Conflict Tactics Scale: Parent-Child version (CTSPC; Straus et al., 1998)		3	more harsh punishment	average .74 (from .69 to .77)	poor self-control	3	poorer self-control	.77 for child report (from .74 to .80) and .82 for caregiver report (from .80 to .89)	429	3	3	0.24	1	-0.24	1	1	0	the more punishment at 11 yrs, the less sc at 11 yrs	Table 2	p. 24	1	-0.244774	0.000449438
274	Hallquist, Hipwell, Stepp	2015	Journal of Abnormal Psychology		USA	91	40	62	274		39.2% reported a primary as Caucasian, 60.2% with minority race	1	2228	2	1	0	1	12	2	4	2	harsh punishment	caregiver and child reports on the Conflict Tactics Scale: Parent-Child version (CTSPC; Straus et al., 1998)		3	more harsh punishment	average .74 (from .69 to .77)	poor self-control	3	poorer self-control	.77 for child report (from .74 to .80) and .82 for caregiver report (from .80 to .93)	430	3	3	0.22	1	-0.22	1	1	0	the more punishment at 10 yrs, the less sc at 12 yrs	Table 2	p. 24	1	-0.223656	0.000449438
274	Hallquist, Hipwell, Stepp	2015	Journal of Abnormal Psychology		USA	91	40	62	274		39.2% reported a primary as Caucasian, 60.2% with minority race	1	2228	2	1	0	1	12	2	4	1	harsh punishment	caregiver and child reports on the Conflict Tactics Scale: Parent-Child version (CTSPC; Straus et al., 1998)		3	more harsh punishment	average .74 (from .69 to .77)	poor self-control	3	poorer self-control	.77 for child report (from .74 to .80) and .82 for caregiver report (from .80 to .94)	431	3	3	0.25	1	-0.25	1	1	0	the more punishment at 11 yrs, the less sc at 12 yrs	Table 2	p. 24	1	-0.255413	0.000449438
274	Hallquist, Hipwell, Stepp	2015	Journal of Abnormal Psychology		USA	91	40	62	274		39.2% reported a primary as Caucasian, 60.2% with minority race	1	2228	1	0	1	0	12	2	4	0	harsh punishment	caregiver and child reports on the Conflict Tactics Scale: Parent-Child version (CTSPC; Straus et al., 1998)		3	more harsh punishment	average .74 (from .69 to .77)	poor self-control	3	poorer self-control	.77 for child report (from .74 to .80) and .82 for caregiver report (from .80 to .95)	432	3	3	0.34	1	-0.34	1	1	0	the more punishment at 12 yrs, the less sc at 12 yrs	Table 2	p. 24	1	-0.354093	0.000449438
274	Hallquist, Hipwell, Stepp	2015	Journal of Abnormal Psychology		USA	91	40	62	274		39.2% reported a primary as Caucasian, 60.2% with minority race	1	2228	2	1	0	1	13	3	9	3	harsh punishment	caregiver and child reports on the Conflict Tactics Scale: Parent-Child version (CTSPC; Straus et al., 1998)		3	more harsh punishment	average .74 (from .69 to .77)	poor self-control	3	poorer self-control	.77 for child report (from .74 to .80) and .82 for caregiver report (from .80 to .98)	433	3	3	0.04	1	-0.04	1	1	0	the more punishment at 10 yrs, the less sc at 13 yrs	Table 2	p. 24	1	-0.0400214	0.000449438
274	Hallquist, Hipwell, Stepp	2015	Journal of Abnormal Psychology		USA	91	40	62	274		39.2% reported a primary as Caucasian, 60.2% with minority race	1	2228	2	1	0	1	13	3	9	2	harsh punishment	caregiver and child reports on the Conflict Tactics Scale: Parent-Child version (CTSPC; Straus et al., 1998)		3	more harsh punishment	average .74 (from .69 to .77)	poor self-control	3	poorer self-control	.77 for child report (from .74 to .80) and .82 for caregiver report (from .80 to .99)	434	3	3	0.08	1	-0.08	1	1	0	the more punishment at 11 yrs, the less sc at 13 yrs	Table 2	p. 24	1	-0.0801713	0.000449438
274	Hallquist, Hipwell, Stepp	2015	Journal of Abnormal Psychology		USA	91	40	62	274		39.2% reported a primary as Caucasian, 60.2% with minority race	1	2228	2	1	0	1	13	3	9	1	harsh punishment	caregiver and child reports on the Conflict Tactics Scale: Parent-Child version (CTSPC; Straus et al., 1998)		3	more harsh punishment	average .74 (from .69 to .77)	poor self-control	3	poorer self-control	.77 for child report (from .74 to .80) and .82 for caregiver report (from .80 to .100)	435	3	3	0.11	1	-0.11	1	1	0	the more punishment at 12 yrs, the less sc at 13 yrs	Table 2	p. 24	1	-0.110447	0.000449438
274	Hallquist, Hipwell, Stepp	2015	Journal of Abnormal Psychology		USA	91	40	62	274		39.2% reported a primary as Caucasian, 60.2% with minority race	1	2228	1	0	1	0	13	3	9	0	harsh punishment	caregiver and child reports on the Conflict Tactics Scale: Parent-Child version (CTSPC; Straus et al., 1998)		3	more harsh punishment	average .74 (from .69 to .77)	poor self-control	3	poorer self-control	.77 for child report (from .74 to .80) and .82 for caregiver report (from .80 to .101)	436	3	3	0.11	1	-0.11	1	1	0	the more punishment at 13 yrs, the less sc at 13 yrs	Table 2	p. 24	1	-0.110447	0.000449438
274	Hallquist, Hipwell, Stepp	2015	Journal of Abnormal Psychology		USA	91	40	62	274		39.2% reported a primary as Caucasian, 60.2% with minority race	1	2228	2	1	0	1	14	4	16	4	harsh punishment	caregiver and child reports on the Conflict Tactics Scale: Parent-Child version (CTSPC; Straus et al., 1998)		3	more harsh punishment	average .74 (from .69 to .77)	poor self-control	3	poorer self-control	.77 for child report (from .74 to .80) and .82 for caregiver report (from .80 to .103)	437	3	3	0.02	1	-0.02	1	1	0	the more punishment at 10 yrs, the less sc at 14 yrs	Table 2	p. 24	1	-0.0200027	0.000449438
274	Hallquist, Hipwell, Stepp	2015	Journal of Abnormal Psychology		USA	91	40	62	274		39.2% reported a primary as Caucasian, 60.2% with minority race	1	2228	2	1	0	1	14	4	16	3	harsh punishment	caregiver and child reports on the Conflict Tactics Scale: Parent-Child version (CTSPC; Straus et al., 1998)		3	more harsh punishment	average .74 (from .69 to .77)	poor self-control	3	poorer self-control	.77 for child report (from .74 to .80) and .82 for caregiver report (from .80 to .104)	438	3	3	0.02	1	-0.02	1	1	0	the more punishment at 11 yrs, the less sc at 14 yrs	Table 2	p. 24	1	-0.0200027	0.000449438
274	Hallquist, Hipwell, Stepp	2015	Journal of Abnormal Psychology		USA	91	40	62	274		39.2% reported a primary as Caucasian, 60.2% with minority race	1	2228	2	1	0	1	14	4	16	2	harsh punishment	caregiver and child reports on the Conflict Tactics Scale: Parent-Child version (CTSPC; Straus et al., 1998)		3	more harsh punishment	average .74 (from .69 to .77)	poor self-control	3	poorer self-control	.77 for child report (from .74 to .80) and .82 for caregiver report (from .80 to .105)	439	3	3	0.02	1	-0.02	1	1	0	the more punishment at 12 yrs, the less sc at 14 yrs	Table 2	p. 24	1	-0.0200027	0.000449438
274	Hallquist, Hipwell, Stepp	2015	Journal of Abnormal Psychology		USA	91	40	62	274		39.2% reported a primary as Caucasian, 60.2% with minority race	1	2228	2	1	0	1	14	4	16	1	harsh punishment	caregiver and child reports on the Conflict Tactics Scale: Parent-Child version (CTSPC; Straus et al., 1998)		3	more harsh punishment	average .74 (from .69 to .77)	poor self-control	3	poorer self-control	.77 for child report (from .74 to .80) and .82 for caregiver report (from .80 to .106)	440	3	3	0.02	1	-0.02	1	1	0	the more punishment at 13 yrs, the less sc at 14 yrs	Table 2	p. 24	1	-0.0200027	0.000449438
274	Hallquist, Hipwell, Stepp	2015	Journal of Abnormal Psychology		USA	91	40	62	274		39.2% reported a primary as Caucasian, 60.2% with minority race	1	2228	1	0	1	0	14	4	16	0	harsh punishment	caregiver and child reports on the Conflict Tactics Scale: Parent-Child version (CTSPC; Straus et al., 1998)		3	more harsh punishment	average .74 (from .69 to .77)	poor self-control	3	poorer self-control	.77 for child report (from .74 to .80) and .82 for caregiver report (from .80 to .107)	441	3	3	0.02	1	-0.02	1	1	0	the more punishment at 14 yrs, the less sc at 14 yrs	Table 2	p. 24	1	-0.0200027	0.000449438
345	Kim-Spoon, Farley, Holmes, et al.,	2014	Journal of Family Psychology	0	USA	91	40	62	1023	Youth Healthy Development (YHD) project	87% White, 10% African American, 2% Hispanic, 1% other	2	219	1	0	1	0	15.12	5.12	26.2144	0	harsh parenting (psychological aggression)	The Conflict Tactics Scale (Straus, Hamby, Finkelhor, Moore, & Runyan, 1998)	conflict tactics scale "mostly used scale for family violence"	1	greater harsh parenting (psychological aggression)	.76 and .79 for mother and father, respectively	self-control	3	greater self-control	0.83	572	3	1	-0.41	2	-0.41	2	0	1	more harsh parenting, lower sc	T1	p.18	1	-0.435611	0.00462963
345	Kim-Spoon, Farley, Holmes, et al.,	2014	Journal of Family Psychology		USA	91	40	62	1023	Youth Healthy Development (YHD) project	87% White, 10% African American, 2% Hispanic, 1% other	2	219	1	0	1	0	15.12	5.12	26.2144	0	harsh parenting (mild physical assault)	The Conflict Tactics Scale (Straus, Hamby, Finkelhor, Moore, & Runyan, 1998)		1	greater harsh parenting (mild physical assault)	.90 and .51 for mother and father, respectively	self-control	3	greater self-control	0.83	573	3	1	-0.3	2	-0.3	2	0	1	more harsh parenting, lower sc	T1	p.18	1	-0.30952	0.00462963
345	Kim-Spoon, Farley, Holmes, et al.,	2014	Journal of Family Psychology		USA	91	40	62	1023	Youth Healthy Development (YHD) project	87% White, 10% African American, 2% Hispanic, 1% other	2	219	1	0	1	0	15.12	5.12	26.2144	0	harsh parenting (severe physical assault)	The Conflict Tactics Scale (Straus, Hamby, Finkelhor, Moore, & Runyan, 1998)		1	greater harsh parenting (severe physical assault)	.75 and .51 for mother and father, respectiviely	self-control	3	greater self-control	0.83	574	3	1	-0.31	2	-0.31	2	0	1	more harsh parenting, lower sc	T1	p.18	1	-0.320545	0.00462963
420	Loukas, Roalson, Herrera	2006	Journal of Early Adolescence	0	USA	91	40	62	420		100% caucausian	2	380	1	0	1	0	11.69	1.69	2.8561	0	parent-adolescent conflict	Conflict Behavior Questionnaire (Prinz, Foster, Kent, & O’Leary, 1979) by Metzler, Biglan, Ary, and Li (1998).	“I got my way by getting	1	more conflict	0.61	effortful control	1	higher score more effortful control		687	3	1	-0.34	2	-0.34	1	1	0	(caucasian pop)more conflict less effortful control	send by authors		1	-0.354093	0.00265252
420	Loukas, Roalson, Herrera	2006	Journal of Early Adolescence		USA	91	40	62	420		100% latino	5	79	1	0	1	0	11.69	1.69	2.8561	0	parent-adolescent conflict	Conflict Behavior Questionnaire (Prinz, Foster, Kent, & O’Leary, 1979) by Metzler, Biglan, Ary, and Li (1998).	angry” and “One of us got so mad, we hit the other person.”	1	more conflict	0.64	effortful control	1	higher score more effortful control		689	3	2	-0.19	2	-0.19	1	1	0	(latino pop) more conflict less effortful control	send by authors		1	-0.192337	0.0131579
466	Moilanen, Rasmussen, Padilla-Walker	2015	Journal of Research on Adolescence		USA	91	40	62	1007	Flourishing Families Project	70% European American, 13% African American, 17% mixed/biracial or other	2	473	1	0	1	0	13.32	3.32	11.0224	0	wave 3 authoritarian parenting (physical coercion)	the Parenting Style and Dimensions Questionnaire-Short version	Coercion	1	more authoritarian parenting (physical coercion)	.66 to .77	wave 3 behavioral self-regulation	2	more behavioral sr	.76 to .79	733	1	1	-0.15	2	-0.15	2	0	1		Table 2	p.253	1	-0.15114	0.00212766
466	Moilanen, Rasmussen, Padilla-Walker	2015	Journal of Research on Adolescence		USA	91	40	62	1007	Flourishing Families Project	70% European American, 13% African American, 17% mixed/biracial or other	2	473	1	0	1	0	13.32	3.32	11.0224	0	wave 3 authoritarian parenting (physical coercion)	the Parenting Style and Dimensions Questionnaire-Short version	Coercion	1	more authoritarian parenting (physical coercion)	.66 to .77	wave 3 emotional self-regulation	2	more emotional sr	.88 to .89	736	1	1	-0.22	2	-0.22	2	0	1		Table 2	p.253	1	-0.223656	0.00212766
466	Moilanen, Rasmussen, Padilla-Walker	2015	Journal of Research on Adolescence		USA	91	40	62	1007	Flourishing Families Project	70% European American, 13% African American, 17% mixed/biracial or other	2	473	1	0	1	0	13.32	3.32	11.0224	0	wave 3 authoritarian parenting (physical coercion)	the Parenting Style and Dimensions Questionnaire-Short version	Coercion	1	more authoritarian parenting (physical coercion)	.66 to .77	wave 3 cognitive self-regulation	2	more cognitive sr	.81 to .82	739	1	1	-0.18	2	-0.18	2	0	1		Table 2	p.253	1	-0.181983	0.00212766
466	Moilanen, Rasmussen, Padilla-Walker	2015	Journal of Research on Adolescence		USA	91	40	62	1007	Flourishing Families Project	70% European American, 13% African American, 17% mixed/biracial or other	2	473	2	1	0	1	14.29	4.29	18.4041	0.97	wave 3 authoritarian parenting (physical coercion)	the Parenting Style and Dimensions Questionnaire-Short version	Coercion	1	more authoritarian parenting (physical coercion)	.66 to .77	wave 4 behavioral self-regulation	2	more behavioral sr	.76 to .79	754	1	1	-0.1	2	-0.1	2	0	1		Table 2	p.253	1	-0.100335	0.00212766
466	Moilanen, Rasmussen, Padilla-Walker	2015	Journal of Research on Adolescence		USA	91	40	62	1007	Flourishing Families Project	70% European American, 13% African American, 17% mixed/biracial or other	2	473	2	1	0	1	14.29	4.29	18.4041	0.97	wave 3 authoritarian parenting (physical coercion)	the Parenting Style and Dimensions Questionnaire-Short version	Coercion	1	more authoritarian parenting (physical coercion)	.66 to .77	wave 4 emotional self-regulation	2	more emotional sr	.88 to .89	757	1	1	-0.23	2	-0.23	2	0	1		Table 2	p.253	1	-0.234189	0.00212766
466	Moilanen, Rasmussen, Padilla-Walker	2015	Journal of Research on Adolescence		USA	91	40	62	1007	Flourishing Families Project	70% European American, 13% African American, 17% mixed/biracial or other	2	473	2	1	0	1	14.29	4.29	18.4041	0.97	wave 3 authoritarian parenting (physical coercion)	the Parenting Style and Dimensions Questionnaire-Short version	Coercion	1	more authoritarian parenting (physical coercion)	.66 to .77	wave 4 cognitive self-regulation	2	more cognitive sr	.81 to .82	760	1	1	-0.22	2	-0.22	2	0	1		Table 2	p.253	1	-0.223656	0.00212766
466	Moilanen, Rasmussen, Padilla-Walker	2015	Journal of Research on Adolescence	0	USA	91	40	62	1007	Flourishing Families Project	70% European American, 13% African American, 17% mixed/biracial or other	2	473	1	0	1	0	14.29	4.29	18.4041	0	wave 4 authoritarian parenting (verbal hostility)	the Parenting Style and Dimensions Questionnaire-Short version	physical coercion (4 items, e.g., “My parent slaps me when I misbe- have”), verbal hostility (4 items, e.g., “My parent yells or shouts when I misbehave”) and punish- ment (4 items, e.g., “My parent punishes me by taking away privileges with little if any explana- tion.”)	1	more authoritarian parenting (verbal hostility)	.66 to .77	wave 4 behavioral self-regulation	2	more behavioral sr	.76 to .79	774	1	1	-0.15	2	-0.15	2	0	1		Table 2	p.253	1	-0.15114	0.00212766
466	Moilanen, Rasmussen, Padilla-Walker	2015	Journal of Research on Adolescence		USA	91	40	62	1007	Flourishing Families Project	70% European American, 13% African American, 17% mixed/biracial or other	2	473	1	0	1	0	14.29	4.29	18.4041	0	wave 4 authoritarian parenting (physical coercion)	the Parenting Style and Dimensions Questionnaire-Short version	Coercion	1	more authoritarian parenting (physical coercion)	.66 to .77	wave 4 behavioral self-regulation	2	more behavioral sr	.76 to .79	775	1	1	-0.13	2	-0.13	2	0	1		Table 2	p.253	1	-0.13074	0.00212766
466	Moilanen, Rasmussen, Padilla-Walker	2015	Journal of Research on Adolescence		USA	91	40	62	1007	Flourishing Families Project	70% European American, 13% African American, 17% mixed/biracial or other	2	473	1	0	1	0	14.29	4.29	18.4041	0	wave 4 authoritarian parenting (verbal hostility)	the Parenting Style and Dimensions Questionnaire-Short version		1	more authoritarian parenting (verbal hostility)	.66 to .77	wave 4 emotional self-regulation	2	more emotional sr	.88 to .89	777	1	1	-0.26	2	-0.26	2	0	1		Table 2	p.253	1	-0.266108	0.00212766
466	Moilanen, Rasmussen, Padilla-Walker	2015	Journal of Research on Adolescence		USA	91	40	62	1007	Flourishing Families Project	70% European American, 13% African American, 17% mixed/biracial or other	2	473	1	0	1	0	14.29	4.29	18.4041	0	wave 4 authoritarian parenting (physical coercion)	the Parenting Style and Dimensions Questionnaire-Short version	Coercion	1	more authoritarian parenting (physical coercion)	.66 to .77	wave 4 emotional self-regulation	2	more emotional sr	.88 to .89	778	1	1	-0.23	2	-0.23	2	0	1		Table 2	p.253	1	-0.234189	0.00212766
466	Moilanen, Rasmussen, Padilla-Walker	2015	Journal of Research on Adolescence		USA	91	40	62	1007	Flourishing Families Project	70% European American, 13% African American, 17% mixed/biracial or other	2	473	1	0	1	0	14.29	4.29	18.4041	0	wave 4 authoritarian parenting (verbal hostility)	the Parenting Style and Dimensions Questionnaire-Short version		1	more authoritarian parenting (verbal hostility)	.66 to .77	wave 4 cognitive self-regulation	2	more cognitive sr	.81 to .82	780	1	1	-0.2	2	-0.2	2	0	1		Table 2	p.253	1	-0.202733	0.00212766
466	Moilanen, Rasmussen, Padilla-Walker	2015	Journal of Research on Adolescence		USA	91	40	62	1007	Flourishing Families Project	70% European American, 13% African American, 17% mixed/biracial or other	2	473	1	0	1	0	14.29	4.29	18.4041	0	wave 4 authoritarian parenting (physical coercion)	the Parenting Style and Dimensions Questionnaire-Short version	Coercion	1	more authoritarian parenting (physical coercion)	.66 to .77	wave 4 cognitive self-regulation	2	more cognitive sr	.81 to .82	781	1	1	-0.24	2	-0.24	2	0	1		Table 2	p.253	1	-0.244774	0.00212766
466	Moilanen, Rasmussen, Padilla-Walker	2015	Journal of Research on Adolescence		USA	91	40	62	1007	Flourishing Families Project	70% European American, 13% African American, 17% mixed/biracial or other	2	473	1	0	1	0	14.29	4.29	18.4041	0	wave 3 authoritarian parenting (physical coercion)	the Parenting Style and Dimensions Questionnaire-Short version	Coercion	1	more authoritarian parenting (physical coercion)	.69 to .80	wave 3 behavioral self-regulation	2	more behavioral sr	.76 to .79	796	2	1	-0.13	2	-0.13	2	0	1		Table 2	p.253	1	-0.13074	0.00212766
466	Moilanen, Rasmussen, Padilla-Walker	2015	Journal of Research on Adolescence		USA	91	40	62	1007	Flourishing Families Project	70% European American, 13% African American, 17% mixed/biracial or other	2	473	1	0	1	0	14.29	4.29	18.4041	0	wave 3 authoritarian parenting (physical coercion)	the Parenting Style and Dimensions Questionnaire-Short version	Coercion	1	more authoritarian parenting (physical coercion)	.69 to .80	wave 3 emotional self-regulation	2	more emotional sr	.88 to .89	799	2	1	-0.12	2	-0.12	2	0	1		Table 2	p.253	1	-0.120581	0.00212766
466	Moilanen, Rasmussen, Padilla-Walker	2015	Journal of Research on Adolescence		USA	91	40	62	1007	Flourishing Families Project	70% European American, 13% African American, 17% mixed/biracial or other	2	473	1	0	1	0	14.29	4.29	18.4041	0	wave 3 authoritarian parenting (physical coercion)	the Parenting Style and Dimensions Questionnaire-Short version	Coercion	1	more authoritarian parenting (physical coercion)	.69 to .80	wave 3 cognitive self-regulation	2	more cognitive sr	.81 to .82	802	2	1	-0.21	2	-0.21	2	0	1		Table 2	p.253	1	-0.213171	0.00212766
466	Moilanen, Rasmussen, Padilla-Walker	2015	Journal of Research on Adolescence		USA	91	40	62	1007	Flourishing Families Project	70% European American, 13% African American, 17% mixed/biracial or other	2	473	2	1	0	1	14.29	4.29	18.4041	0.97	wave 3 authoritarian parenting (physical coercion)	the Parenting Style and Dimensions Questionnaire-Short version	Coercion	1	more authoritarian parenting (physical coercion)	.69 to .80	wave 4 behavioral self-regulation	2	more behavioral sr	.76 to .79	817	2	1	-0.13	2	-0.13	2	0	1		Table 2	p.253	1	-0.13074	0.00212766
466	Moilanen, Rasmussen, Padilla-Walker	2015	Journal of Research on Adolescence		USA	91	40	62	1007	Flourishing Families Project	70% European American, 13% African American, 17% mixed/biracial or other	2	473	2	1	0	1	14.29	4.29	18.4041	0.97	wave 3 authoritarian parenting (physical coercion)	the Parenting Style and Dimensions Questionnaire-Short version	Coercion	1	more authoritarian parenting (physical coercion)	.69 to .80	wave 4 emotional self-regulation	2	more emotional sr	.88 to .89	820	2	1	-0.11	2	-0.11	2	0	1		Table 2	p.253	1	-0.110447	0.00212766
466	Moilanen, Rasmussen, Padilla-Walker	2015	Journal of Research on Adolescence		USA	91	40	62	1007	Flourishing Families Project	70% European American, 13% African American, 17% mixed/biracial or other	2	473	2	1	0	1	14.29	4.29	18.4041	0.97	wave 3 authoritarian parenting (physical coercion)	the Parenting Style and Dimensions Questionnaire-Short version	Coercion	1	more authoritarian parenting (physical coercion)	.69 to .80	wave 4 cognitive self-regulation	2	more cognitive sr	.81 to .82	823	2	1	-0.2	2	-0.2	2	0	1		Table 2	p.253	1	-0.202733	0.00212766
466	Moilanen, Rasmussen, Padilla-Walker	2015	Journal of Research on Adolescence		USA	91	40	62	1007	Flourishing Families Project	70% European American, 13% African American, 17% mixed/biracial or other	2	473	1	0	1	0	14.29	4.29	18.4041	0	wave 4 authoritarian parenting (verbal hostility)	the Parenting Style and Dimensions Questionnaire-Short version		1	more authoritarian parenting (verbal hostility)	.69 to .80	wave 4 behavioral self-regulation	2	more behavioral sr	.76 to .79	837	2	1	-0.07	2	-0.07	2	0	1		Table 2	p.253	1	-0.0701147	0.00212766
466	Moilanen, Rasmussen, Padilla-Walker	2015	Journal of Research on Adolescence		USA	91	40	62	1007	Flourishing Families Project	70% European American, 13% African American, 17% mixed/biracial or other	2	473	1	0	1	0	14.29	4.29	18.4041	0	wave 4 authoritarian parenting (physical coercion)	the Parenting Style and Dimensions Questionnaire-Short version	Coercion	1	more authoritarian parenting (physical coercion)	.69 to .80	wave 4 behavioral self-regulation	2	more behavioral sr	.76 to .79	838	2	1	-0.11	2	-0.11	2	0	1		Table 2	p.253	1	-0.110447	0.00212766
466	Moilanen, Rasmussen, Padilla-Walker	2015	Journal of Research on Adolescence		USA	91	40	62	1007	Flourishing Families Project	70% European American, 13% African American, 17% mixed/biracial or other	2	473	1	0	1	0	14.29	4.29	18.4041	0	wave 4 authoritarian parenting (verbal hostility)	the Parenting Style and Dimensions Questionnaire-Short version		1	more authoritarian parenting (verbal hostility)	.69 to .80	wave 4 emotional self-regulation	2	more emotional sr	.88 to .89	840	2	1	-0.2	2	-0.2	2	0	1		Table 2	p.253	1	-0.202733	0.00212766
466	Moilanen, Rasmussen, Padilla-Walker	2015	Journal of Research on Adolescence		USA	91	40	62	1007	Flourishing Families Project	70% European American, 13% African American, 17% mixed/biracial or other	2	473	1	0	1	0	14.29	4.29	18.4041	0	wave 4 authoritarian parenting (physical coercion)	the Parenting Style and Dimensions Questionnaire-Short version	Coercion	1	more authoritarian parenting (physical coercion)	.69 to .80	wave 4 emotional self-regulation	2	more emotional sr	.88 to .89	841	2	1	-0.11	2	-0.11	2	0	1		Table 2	p.253	1	-0.110447	0.00212766
466	Moilanen, Rasmussen, Padilla-Walker	2015	Journal of Research on Adolescence		USA	91	40	62	1007	Flourishing Families Project	70% European American, 13% African American, 17% mixed/biracial or other	2	473	1	0	1	0	14.29	4.29	18.4041	0	wave 4 authoritarian parenting (verbal hostility)	the Parenting Style and Dimensions Questionnaire-Short version		1	more authoritarian parenting (verbal hostility)	.69 to .80	wave 4 cognitive self-regulation	2	more cognitive sr	.81 to .82	843	2	1	-0.08	2	-0.08	2	0	1		Table 2	p.253	1	-0.0801713	0.00212766
466	Moilanen, Rasmussen, Padilla-Walker	2015	Journal of Research on Adolescence		USA	91	40	62	1007	Flourishing Families Project	70% European American, 13% African American, 17% mixed/biracial or other	2	473	1	0	1	0	14.29	4.29	18.4041	0	wave 4 authoritarian parenting (physical coercion)	the Parenting Style and Dimensions Questionnaire-Short version	Coercion	1	more authoritarian parenting (physical coercion)	.69 to .80	wave 4 cognitive self-regulation	2	more cognitive sr	.81 to .82	844	2	1	-0.12	2	-0.12	2	0	1		Table 2	p.253	1	-0.120581	0.00212766
473	Moon, Morash & McCluskey	2012	Crime & Delinquency	0	South-Korea	18	60	39	473			4	2817	1	0	1	0	12	2	4	0	family conflict	extent of physical and verbal arguments/fights between parents and being verbally and/or physical punished by parents	extent of physical and verbal arguments/fights between parents and being verbally and/or physical punished by parents	1	higher scores more family conflict	0.82	low self-control	1	higher scores lower self-control	0.63	903	3	1	0.22	1	-0.22	1	1	0	more faimly conlfict lower self-control	2	839	1	-0.223656	0.000355366
569	Rowe , Zimmer-Gembeck & Hood	2016	Journal of Adolescence	0	Australia	90	36	61	1010	Longitudinal Study of Australian Children (LSAC)	The majority of adolescents were born in Australia (96.2%) and spoke English at home (89.5%), with 2.8% identifying as Indigenous Australians.	2	3797	1	0	1	0	10.3	0.3	0.09	0	Parental hostility	‘How often are you angry when you punish the study child?’	‘How often are you angry when you punish the study child?’	2	more hostility	0.69	persistence	2	more persistence	0.82	1077	1	1	-0.36	2	-0.36	1	1	0	more parental hositlity less sc	2	225	1	-0.376886	0.000263574
569	Rowe , Zimmer-Gembeck & Hood	2016	Journal of Adolescence		Australia	90	36	61	1010	Longitudinal Study of Australian Children (LSAC)	The majority of adolescents were born in Australia (96.2%) and spoke English at home (89.5%), with 2.8% identifying as Indigenous Australians.	2	3797	1	0	1	0	10.3	0.3	0.09	0	Family conflict	‘How often do people in your family yell at each other’,		1	more conflict		persistence	2	more persistence	0.82	1078	3	1	-0.13	2	-0.13	2	0	1	more conflict less sc	2	225	1	-0.13074	0.000263574
584	Schwarz, Stutz, Ledermann	2012	Journal of Youth and Adolescence		Switzerland	68	34	70	584			2	180	2	1	0	1	11.61	1.61	2.5921	1	conflict frequency	the Childrens's Perception of the Interparental Conflict Scale (CPIC; Grych et al., 1992)		1	higher conflict frequency	0.72	adaptive emotion regulation of anger (distraction)	1	more use of distraction	0.91	1093	3	1	-0.15	2	-0.15	1	1	0	more T1 conflict frequency, less T2 emotional sr of anger	Table 1	p.1247	1	-0.15114	0.00564972
584	Schwarz, Stutz, Ledermann	2012	Journal of Youth and Adolescence		Switzerland	68	34	70	584			2	180	2	1	0	1	11.61	1.61	2.5921	1	conflict resolution	the Childrens's Perception of the Interparental Conflict Scale (CPIC; Grych et al., 1992)		1	more conflict solution	0.74	adaptive emotion regulation of anger (distraction)	1	more use of distraction	0.91	1094	3	1	0.16	2	-0.16	1	1	0	more T1 conflict resolution, more T2 emotional sr of anger	Table 1	p.1247	1	-0.161387	0.00564972
584	Schwarz, Stutz, Ledermann	2012	Journal of Youth and Adolescence		Switzerland	68	34	70	584			2	180	2	1	0	1	11.61	1.61	2.5921	1	conflict intensity	the Childrens's Perception of the Interparental Conflict Scale (CPIC; Grych et al., 1992)		1	greater intensity	0.61	adaptive emotion regulation of anger (distraction)	1	more use of distraction	0.91	1095	3	1	-0.08	2	-0.08	1	1	0	more T1 conflict intensity, less T2 emotional sr of anger	Table 1	p.1247	1	-0.0801713	0.00564972
584	Schwarz, Stutz, Ledermann	2012	Journal of Youth and Adolescence		Switzerland	68	34	70	584			2	180	2	1	0	1	11.61	1.61	2.5921	1	conflict frequency	the Childrens's Perception of the Interparental Conflict Scale (CPIC; Grych et al., 1992)		1	higher conflict frequency	0.72	adaptive emotion regulation of anger (mood enhancement)	1	more use of mood enhancement	0.91	1100	3	1	-0.12	2	-0.12	1	1	0	more T1 conflict frequency, less T2 emotional sr of anger	Table 1	p.1247	1	-0.120581	0.00564972
584	Schwarz, Stutz, Ledermann	2012	Journal of Youth and Adolescence		Switzerland	68	34	70	584			2	180	2	1	0	1	11.61	1.61	2.5921	1	conflict resolution	the Childrens's Perception of the Interparental Conflict Scale (CPIC; Grych et al., 1992)		1	more conflict solution	0.74	adaptive emotion regulation of anger (mood enhancement)	1	more use of mood enhancement	0.91	1101	3	1	0.19	2	-0.19	1	1	0	more T1 conflict resolution, more T2 emotional sr of anger	Table 1	p.1247	1	-0.192337	0.00564972
584	Schwarz, Stutz, Ledermann	2012	Journal of Youth and Adolescence		Switzerland	68	34	70	584			2	180	2	1	0	1	11.61	1.61	2.5921	1	conflict intensity	the Childrens's Perception of the Interparental Conflict Scale (CPIC; Grych et al., 1992)		1	greater intensity	0.61	adaptive emotion regulation of anger (mood enhancement)	1	more use of mood enhancement	0.91	1102	3	1	-0.05	2	-0.05	1	1	0	more T1 conflict intensity, less T2 emotional sr of anger	Table 1	p.1247	1	-0.0500417	0.00564972
584	Schwarz, Stutz, Ledermann	2012	Journal of Youth and Adolescence		Switzerland	68	34	70	584			2	180	2	1	0	1	11.61	1.61	2.5921	1	conflict frequency	the Childrens's Perception of the Interparental Conflict Scale (CPIC; Grych et al., 1992)		1	higher conflict frequency	0.72	adaptive emotion regulation of anger (acceptance)	1	more use of acceptance	0.91	1107	3	1	-0.1	2	-0.1	1	1	0	more T1 conflict frequency, less T2 emotional sr of anger	Table 1	p.1247	1	-0.100335	0.00564972
584	Schwarz, Stutz, Ledermann	2012	Journal of Youth and Adolescence		Switzerland	68	34	70	584			2	180	2	1	0	1	11.61	1.61	2.5921	1	conflict resolution	the Childrens's Perception of the Interparental Conflict Scale (CPIC; Grych et al., 1992)		1	more conflict solution	0.74	adaptive emotion regulation of anger (acceptance)	1	more use of acceptance	0.91	1108	3	1	0.26	2	-0.26	1	1	0	more T1 conflict resolution, more T2 emotional sr of anger	Table 1	p.1247	1	-0.266108	0.00564972
584	Schwarz, Stutz, Ledermann	2012	Journal of Youth and Adolescence		Switzerland	68	34	70	584			2	180	2	1	0	1	11.61	1.61	2.5921	1	conflict intensity	the Childrens's Perception of the Interparental Conflict Scale (CPIC; Grych et al., 1992)		1	greater intensity	0.61	adaptive emotion regulation of anger (acceptance)	1	more use of acceptance	0.91	1109	3	1	-0.13	2	-0.13	1	1	0	more T1 conflict intensity, less T2 emotional sr of anger	Table 1	p.1247	1	-0.13074	0.00564972
584	Schwarz, Stutz, Ledermann	2012	Journal of Youth and Adolescence		Switzerland	68	34	70	584			2	180	2	1	0	1	11.61	1.61	2.5921	1	conflict frequency	the Childrens's Perception of the Interparental Conflict Scale (CPIC; Grych et al., 1992)		1	higher conflict frequency	0.72	adaptive emotion regulation of anger (oblivion)	1	more use of oblivion	0.91	1114	3	1	-0.17	2	-0.17	1	1	0	more T1 conflict frequency, less T2 emotional sr of anger	Table 1	p.1247	1	-0.171667	0.00564972
584	Schwarz, Stutz, Ledermann	2012	Journal of Youth and Adolescence		Switzerland	68	34	70	584			2	180	2	1	0	1	11.61	1.61	2.5921	1	conflict resolution	the Childrens's Perception of the Interparental Conflict Scale (CPIC; Grych et al., 1992)		1	more conflict solution	0.74	adaptive emotion regulation of anger (oblivion)	1	more use of oblivion	0.91	1115	3	1	0.2	2	-0.2	1	1	0	more T1 conflict resolution, more T2 emotional sr of anger	Table 1	p.1247	1	-0.202733	0.00564972
584	Schwarz, Stutz, Ledermann	2012	Journal of Youth and Adolescence		Switzerland	68	34	70	584			2	180	2	1	0	1	11.61	1.61	2.5921	1	conflict intensity	the Childrens's Perception of the Interparental Conflict Scale (CPIC; Grych et al., 1992)		1	greater intensity	0.61	adaptive emotion regulation of anger (oblivion)	1	more use of oblivion	0.91	1116	3	1	-0.1	2	-0.1	1	1	0	more T1 conflict intensity, less T2 emotional sr of anger	Table 1	p.1247	1	-0.100335	0.00564972
584	Schwarz, Stutz, Ledermann	2012	Journal of Youth and Adolescence		Switzerland	68	34	70	584			2	180	2	1	0	1	11.61	1.61	2.5921	1	conflict frequency	the Childrens's Perception of the Interparental Conflict Scale (CPIC; Grych et al., 1992)		1	higher conflict frequency	0.72	adaptive emotion regulation of anger (cognitive problem solving)	1	more use of cognitive problem solving	0.91	1121	3	1	-0.24	2	-0.24	1	1	0	more T1 conflict frequency, less T2 emotional sr of anger	Table 1	p.1247	1	-0.244774	0.00564972
584	Schwarz, Stutz, Ledermann	2012	Journal of Youth and Adolescence		Switzerland	68	34	70	584			2	180	2	1	0	1	11.61	1.61	2.5921	1	conflict resolution	the Childrens's Perception of the Interparental Conflict Scale (CPIC; Grych et al., 1992)		1	more conflict solution	0.74	adaptive emotion regulation of anger (cognitive problem solving)	1	more use of cognitive problem solving	0.91	1122	3	1	0.21	2	-0.21	1	1	0	more T1 conflict resolution, more T2 emotional sr of anger	Table 1	p.1247	1	-0.213171	0.00564972
584	Schwarz, Stutz, Ledermann	2012	Journal of Youth and Adolescence		Switzerland	68	34	70	584			2	180	2	1	0	1	11.61	1.61	2.5921	1	conflict intensity	the Childrens's Perception of the Interparental Conflict Scale (CPIC; Grych et al., 1992)		1	greater intensity	0.61	adaptive emotion regulation of anger (cognitive problem solving)	1	more use of cognitive problem solving	0.91	1123	3	1	-0.22	2	-0.22	1	1	0	more T1 conflict intensity, less T2 emotional sr of anger	Table 1	p.1247	1	-0.223656	0.00564972
584	Schwarz, Stutz, Ledermann	2012	Journal of Youth and Adolescence		Switzerland	68	34	70	584			2	180	2	1	0	1	11.61	1.61	2.5921	1	conflict frequency	the Childrens's Perception of the Interparental Conflict Scale (CPIC; Grych et al., 1992)		1	higher conflict frequency	0.72	adaptive emotion regulation of anger (reevaluation)	1	more use of reevaluation	0.91	1128	3	1	-0.16	2	-0.16	1	1	0	more T1 conflict frequency, less T2 emotional sr of anger	Table 1	p.1247	1	-0.161387	0.00564972
584	Schwarz, Stutz, Ledermann	2012	Journal of Youth and Adolescence		Switzerland	68	34	70	584			2	180	2	1	0	1	11.61	1.61	2.5921	1	conflict resolution	the Childrens's Perception of the Interparental Conflict Scale (CPIC; Grych et al., 1992)		1	more conflict solution	0.74	adaptive emotion regulation of anger (reevaluation)	1	more use of reevaluation	0.91	1129	3	1	0.2	2	-0.2	1	1	0	more T1 conflict resolution, more T2 emotional sr of anger	Table 1	p.1247	1	-0.202733	0.00564972
584	Schwarz, Stutz, Ledermann	2012	Journal of Youth and Adolescence		Switzerland	68	34	70	584			2	180	2	1	0	1	11.61	1.61	2.5921	1	conflict intensity	the Childrens's Perception of the Interparental Conflict Scale (CPIC; Grych et al., 1992)		1	greater intensity	0.61	adaptive emotion regulation of anger (reevaluation)	1	more use of reevaluation	0.91	1130	3	1	-0.17	2	-0.17	1	1	0	more T1 conflict intensity, less T2 emotional sr of anger	Table 1	p.1247	1	-0.171667	0.00564972
594	Shin, Cook, Morris et al	2016	Preventive Medicine	0	USA	91	40	62	594		55.5% white	1	333	1	0	1	0	21.7	11.7	136.89	0	Emotional Abuse	Childhood maltreatment was assessed using a computer assisted self-interviewing (CASI) method of the Childhood Trauma Question- naire (CTQ) (Bernstein et al., 1994; Bernstein and Fink, 1998).	Childhood Trauma Question- naire (CTQ)	1	higher scores more abuse	0.89	Lack of urgency	1	Higher UPPS scale scores indicate a more impul- sive personality.	0.89	1167	3	1	0.4	1	-0.4	1	1	0	more abuse, more lack of urgency	table 3	216	1	-0.423649	0.0030303
594	Shin, Cook, Morris et al	2016	Preventive Medicine		USA	91	40	62	594		55.5% white	1	333	1	0	1	0	21.7	11.7	136.89	0	Emotional Abuse	Childhood maltreatment was assessed using a computer assisted self-interviewing (CASI) method of the Childhood Trauma Question- naire (CTQ) (Bernstein et al., 1994; Bernstein and Fink, 1998).		1	higher scores more abuse	0.89	lack of premeditation	1	Higher UPPS scale scores indicate a more impul- sive personality.	0.92	1168	3	1	0.11	1	-0.11	1	1	0	more abuse, more lack of premeditation	table 3	216	1	-0.110447	0.0030303
594	Shin, Cook, Morris et al	2016	Preventive Medicine		USA	91	40	62	594		55.5% white	1	333	1	0	1	0	21.7	11.7	136.89	0	Emotional Abuse	Childhood maltreatment was assessed using a computer assisted self-interviewing (CASI) method of the Childhood Trauma Question- naire (CTQ) (Bernstein et al., 1994; Bernstein and Fink, 1998).		1	higher scores more abuse	0.89	lack of perseverence	1	Higher UPPS scale scores indicate a more impul- sive personality.	0.72	1169	3	1	0.13	1	-0.13	1	1	0	more abuse, more lack of perseverence	table 3	216	1	-0.13074	0.0030303
594	Shin, Cook, Morris et al	2016	Preventive Medicine		USA	91	40	62	594		55.5% white	1	333	1	0	1	0	21.7	11.7	136.89	0	Emotional Abuse	Childhood maltreatment was assessed using a computer assisted self-interviewing (CASI) method of the Childhood Trauma Question- naire (CTQ) (Bernstein et al., 1994; Bernstein and Fink, 1998).		1	higher scores more abuse	0.89	sensation seeking	1	Higher UPPS scale scores indicate a more impul- sive personality.	0.9	1170	3	1	0.01	1	-0.01	1	1	0	more abuse, more sensation seeking	table 3	216	1	-0.0100003	0.0030303
594	Shin, Cook, Morris et al	2016	Preventive Medicine		USA	91	40	62	594		55.5% white	1	333	1	0	1	0	21.7	11.7	136.89	0	Physical Abuse	Childhood maltreatment was assessed using a computer assisted self-interviewing (CASI) method of the Childhood Trauma Question- naire (CTQ) (Bernstein et al., 1994; Bernstein and Fink, 1998).		1	higher scores more abuse	0.86	Lack of urgency	1	Higher UPPS scale scores indicate a more impul- sive personality.	0.89	1171	3	1	0.19	1	-0.19	1	1	0	more abuse, more lack of urgency	table 3	216	1	-0.192337	0.0030303
594	Shin, Cook, Morris et al	2016	Preventive Medicine		USA	91	40	62	594		55.5% white	1	333	1	0	1	0	21.7	11.7	136.89	0	Physical Abuse	Childhood maltreatment was assessed using a computer assisted self-interviewing (CASI) method of the Childhood Trauma Question- naire (CTQ) (Bernstein et al., 1994; Bernstein and Fink, 1998).		1	higher scores more abuse	0.86	lack of premeditation	1	Higher UPPS scale scores indicate a more impul- sive personality.	0.92	1172	3	1	0.06	1	-0.06	1	1	0	more abuse, more lack of premeditation	table 3	216	1	-0.0600722	0.0030303
594	Shin, Cook, Morris et al	2016	Preventive Medicine		USA	91	40	62	594		55.5% white	1	333	1	0	1	0	21.7	11.7	136.89	0	Physical Abuse	Childhood maltreatment was assessed using a computer assisted self-interviewing (CASI) method of the Childhood Trauma Question- naire (CTQ) (Bernstein et al., 1994; Bernstein and Fink, 1998).		1	higher scores more abuse	0.86	lack of perseverence	1	Higher UPPS scale scores indicate a more impul- sive personality.	0.72	1173	3	1	0.01	1	-0.01	1	1	0	more abuse, more lack of perseverence	table 3	216	1	-0.0100003	0.0030303
594	Shin, Cook, Morris et al	2016	Preventive Medicine		USA	91	40	62	594		55.5% white	1	333	1	0	1	0	21.7	11.7	136.89	0	Physical Abuse	Childhood maltreatment was assessed using a computer assisted self-interviewing (CASI) method of the Childhood Trauma Question- naire (CTQ) (Bernstein et al., 1994; Bernstein and Fink, 1998).		1	higher scores more abuse	0.86	sensation seeking	1	Higher UPPS scale scores indicate a more impul- sive personality.	0.9	1174	3	1	0.08	1	-0.08	1	1	0	more abuse, more sensation seeking	table 3	216	1	-0.0801713	0.0030303
603	Simons, Simons, Chen, et al.	2007	Criminology	0	USA	91	40	62	603		African American	3	673	1	0	1	0	12.5	2.5	6.25	0	hostility/rejection	3 items completed by caregiver and 14 items reported by the child	How often do you hit your child with a belt or paddle? How often do you lose your temper and yell at your child?) and a 14-item scale completed by the target child (How often does your parent push, grab, hit, or shove you? How often does your par- ent shout or yell at you?)	3	more hostility/rejection	.70 for both waves and .79 for composite	low self-control	1	lower sc	.77 at T1 and .81 at T2	1180	1	1	0.16	1	-0.16	2	0	1	more rejection/hostility, less sc	Table 2	p.498	1	-0.161387	0.00149254
605	Simons, Simons,Landor, et al.	2014	Journal of Family Psychology	1	USA	91	40	62	1017	the Family andCommunity Health Study (FACHS)	African American	3	345	2	1	0	1	18	8	64	3	harsh parenting	14 items to assess the construct (e.g., how often during the preceeding year the primary caregiver engaged in various harsh parenting practices		1	more harsh parenting	.71 to .82	self-control	1	more sc	0.7	1183	1	1	-0.2	2	-0.2	1	1	0	more harsh parenting, less sc	Table 1	p.22	1	-0.202733	0.00292398
606	Simons, Sutton, Simons et al	2016	Journal of Youth and Adolescence	1	USA	91	40	62	1017	the Family andCommunity Health Study (FACHS)	African american	3	351	1	0	1	0	12.5	2.5	6.25	0	harsh parenting	youth reported on harsh, hostile parenting practices displayed by their PC		1	higher scores more harsh parenting	0.7	self-control	1	higher scores more sc	0.76	1186	1	3	-0.08	2	-0.08	1	1	0	more harsh parenting less sc	1	263	1	-0.0801713	0.00287356
606	Simons, Sutton, Simons et al	2016	Journal of Youth and Adolescence		USA	91	40	62	1017	the Family andCommunity Health Study (FACHS)	African american	3	278	1	0	1	0	12.5	2.5	6.25	0	harsh parenting	youth reported on harsh, hostile parenting practices displayed by their PC		1	higher scores more harsh parenting	0.7	self-control	1	higher scores more sc	0.8	1189	1	2	-0.23	2	-0.23	1	1	0	more harsh parenting less sc	1	263	1	-0.234189	0.00363636
655	Unnever, Cullen & Agnew	2006	Youth Violence and Juvenile Justice	0	USA	91	40	62	655		The percentage of students who reported they were non-White was 40%	2	2395	1	0	1	0	12.4	2.4	5.76	0	family conflict	items including questions like How often have your parents/guardians argued heatedly or shouted at each other? How often have your parents/guardians ended up threatening each other?	How often have your parents/guardians argued heatedly or shouted at each other?	1	more family conflict	0.77	low self-control	1	lower self-control	0.87	1269	3	1	0.25	1	-0.25	1	1	0	more family conlfict more low self-control	A	23	1	-0.255413	0.00041806
655	Unnever, Cullen & Agnew	2006	Youth Violence and Juvenile Justice		USA	91	40	62	655		The percentage of students who reported they were non-White was 40%	2	2395	1	0	1	0	12.4	2.4	5.76	0	coercive parents	Coercive parenting (Simon,s Wu et al. 1994) the degree to which the respondent’s parents or guardians used authoritarian parenting techniques such as yelling and hitting	Coercion	1	higher scores more coercive parenting	0.72	low self-control	1	lower self-control	0.87	1272	3	1	0.31	1	-0.31	1	1	0	more coercive parents more low self-control	A	23	1	-0.320545	0.00041806
686	Wang, Brinkworth, Eccles	2013	Developmental Psychology	0	USA	91	40	62	686		51% African American, 44% European, 5% either biracial or other	1	1479	1	0	1	0	12.9	2.9	8.41	0	parent-child conflict	items adapted from the Family Management Study (Furstenberg et al., 1999)	“How often do you shout or yell at your child?” “How often do you criticize your child’s ideas?” “How often do you and your child have disagreements or arguments about how she/he spends time outside of school?”	2	higher levels of conflicts between parents and adolescents	0.89	effortful control	1	higher effortful control	0.82	1328	3	1	-0.21	2	-0.21	2	0	1	the more parent-child conflict, the less effortful control	T1	p.696	1	-0.213171	0.000677507
760	Eisenberg, Hofer, Spinrad, et al.	2008	Monographs of the Society for Research in Child Development	0	USA	91	40	62	760		79% reported as European American at T1	2	64	1	0	1	0	13	3	9	0	mother-adolescent conflict (mothers' conflict reactions-hostile verbal)	the conflictual interaction, postconflict reports	the hostility refers to open hostility, sarcasm, put-down, or mocking	3	more hostile verbal		combination of ego control and effortful control	2	greater control/regulation	> .78 (across subscales), no alpha for final composite score	1421	1	3	-0.12	2	-0.12	2	0	1	lower mother report control, more mothers' hostile verbal in reaction to conlifct	Table 9	p.115	1	-0.120581	0.0163934
760	Eisenberg, Hofer, Spinrad, et al.	2008	Monographs of the Society for Research in Child Development		USA	91	40	62	760		79% reported as European American at T1	2	64	1	0	1	0	13	3	9	0	mother-adolescent conflict (mothers' conflict reactions-disharmonious verbalizations)	the conflictual interaction, postconflict reports		3	more disharmonious verbal		combination of ego control and effortful control	2	greater control/regulation	> .78 (across subscales), no alpha for final composite score	1422	1	3	-0.38	2	-0.38	2	0	1	lower mother report control, more mothers' disharmonious verbal in reaction to conlifct	Table 9	p.115	1	-0.40006	0.0163934
760	Eisenberg, Hofer, Spinrad, et al.	2008	Monographs of the Society for Research in Child Development		USA	91	40	62	760		79% reported as European American at T1	2	64	1	0	1	0	13	3	9	0	mother-adolescent conflict (mothers' conflict reactions-anger affect)	the conflictual interaction, postconflict reports		3	more anger affect		combination of ego control and effortful control	2	greater control/regulation	> .78 (across subscales), no alpha for final composite score	1423	1	3	-0.56	2	-0.56	2	0	1	lower mother report control, more mothers' anger affect in reaction to conlifct	Table 9	p.115	1	-0.632833	0.0163934
760	Eisenberg, Hofer, Spinrad, et al.	2008	Monographs of the Society for Research in Child Development		USA	91	40	62	760		79% reported as European American at T1	2	64	1	0	1	0	13	3	9	0	mother-adolescent conflict (mothers' conflict reactions-positive affect/verbal)	the conflictual interaction, postconflict reports		3	more positive affect/verbal		combination of ego control and effortful control	2	greater control/regulation	> .78 (across subscales), no alpha for final composite score	1424	1	3	0.24	1	-0.24	2	0	1	more mother report control, more mothers' positive affect/control in reaction to conlifct	Table 9	p.115	1	-0.244774	0.0163934
760	Eisenberg, Hofer, Spinrad, et al.	2008	Monographs of the Society for Research in Child Development		USA	91	40	62	760		79% reported as European American at T1	2	64	1	0	1	0	13	3	9	0	mother-adolescent conflict (mothers' conflict reactions-hostile verbal)	the conflictual interaction, postconflict reports		3	more hostile verbal		combination of ego control and effortful control	2	greater control/regulation	> .78 (across subscales), no alpha for final composite score	1425	1	3	-0.19	2	-0.19	2	0	1	lower teacher report control, more mothers' hostile verbal in reaction to conlifct	Table 9	p.115	1	-0.192337	0.0163934
760	Eisenberg, Hofer, Spinrad, et al.	2008	Monographs of the Society for Research in Child Development		USA	91	40	62	760		79% reported as European American at T1	2	64	1	0	1	0	13	3	9	0	mother-adolescent conflict (mothers' conflict reactions-disharmonious verbalizations)	the conflictual interaction, postconflict reports		3	more disharmonious verbal		combination of ego control and effortful control	2	greater control/regulation	> .78 (across subscales), no alpha for final composite score	1426	1	3	-0.41	2	-0.41	2	0	1	lower teacher report control, more mothers' disharmonious verbal in reaction to conlifct	Table 9	p.115	1	-0.435611	0.0163934
760	Eisenberg, Hofer, Spinrad, et al.	2008	Monographs of the Society for Research in Child Development		USA	91	40	62	760		79% reported as European American at T1	2	64	1	0	1	0	13	3	9	0	mother-adolescent conflict (mothers' conflict reactions-anger affect)	the conflictual interaction, postconflict reports		3	more anger affect		combination of ego control and effortful control	2	greater control/regulation	> .78 (across subscales), no alpha for final composite score	1427	1	3	-0.24	2	-0.24	2	0	1	lower teacher report control, more mothers' anger affect in reaction to conlifct	Table 9	p.115	1	-0.244774	0.0163934
760	Eisenberg, Hofer, Spinrad, et al.	2008	Monographs of the Society for Research in Child Development		USA	91	40	62	760		79% reported as European American at T1	2	64	1	0	1	0	13	3	9	0	mother-adolescent conflict (mothers' conflict reactions-positive affect/verbal)	the conflictual interaction, postconflict reports		3	more positive affect/verbal		combination of ego control and effortful control	2	greater control/regulation	> .78 (across subscales), no alpha for final composite score	1428	1	3	0	1	0	2	0	1	more teacher report control, more mothers' positive affect/control in reaction to conlifct	Table 9	p.115	1	0	0.0163934
760	Eisenberg, Hofer, Spinrad, et al.	2008	Monographs of the Society for Research in Child Development		USA	91	40	62	760		79% reported as European American at T1	2	64	1	0	1	0	13	3	9	0	mother-adolescent conflict (mothers' conflict reactions-hostile verbal)	the conflictual interaction, postconflict reports		3	more hostile verbal		combination of ego control and effortful control		greater control/regulation	.99 for interrater reliability	1429	1	3	-0.01	2	-0.01	2	0	1	lower observed control, more mothers' hostile verbal in reaction to conlifct	Table 9	p.115	1	-0.0100003	0.0163934
760	Eisenberg, Hofer, Spinrad, et al.	2008	Monographs of the Society for Research in Child Development		USA	91	40	62	760		79% reported as European American at T1	2	64	1	0	1	0	13	3	9	0	mother-adolescent conflict (mothers' conflict reactions-disharmonious verbalizations)	the conflictual interaction, postconflict reports		3	more disharmonious verbal		combination of ego control and effortful control		greater control/regulation	.99 for interrater reliability	1430	1	3	0.11	2	0.11	2	0	1	lower observed report control, more mothers' disharmonious verbal in reaction to conlifct	Table 9	p.115	1	0.110447	0.0163934
760	Eisenberg, Hofer, Spinrad, et al.	2008	Monographs of the Society for Research in Child Development		USA	91	40	62	760		79% reported as European American at T1	2	64	1	0	1	0	13	3	9	0	mother-adolescent conflict (mothers' conflict reactions-anger affect)	the conflictual interaction, postconflict reports		3	more anger affect		combination of ego control and effortful control		greater control/regulation	.99 for interrater reliability	1431	1	3	0.03	2	0.03	2	0	1	lower observed report control, more mothers' anger affect in reaction to conlifct	Table 9	p.115	1	0.030009	0.0163934
760	Eisenberg, Hofer, Spinrad, et al.	2008	Monographs of the Society for Research in Child Development		USA	91	40	62	760		79% reported as European American at T1	2	64	1	0	1	0	13	3	9	0	mother-adolescent conflict (mothers' conflict reactions-positive affect/verbal)	the conflictual interaction, postconflict reports		3	more positive affect/verbal		combination of ego control and effortful control		greater control/regulation	.99 for interrater reliability	1432	1	3	-0.11	1	0.11	2	0	1	more observed report control, LESS mothers' positive affect/control in reaction to conlifct	Table 9	p.115	1	0.110447	0.0163934
760	Eisenberg, Hofer, Spinrad, et al.	2008	Monographs of the Society for Research in Child Development		USA	91	40	62	760		79% reported as European American at T1	2	62	1	0	1	0	13	3	9	0	mother-adolescent conflict (mothers' conflict reactions-hostile verbal)	the conflictual interaction, postconflict reports		3	more hostile verbal		combination of ego control and effortful control	2	greater control/regulation	> .78 (across subscales), no alpha for final composite score	1450	1	2	-0.11	2	-0.11	2	0	1	lower mother report control, more mothers' hostile verbal in reaction to conlifct	Table 9	p.115	1	-0.110447	0.0169492
760	Eisenberg, Hofer, Spinrad, et al.	2008	Monographs of the Society for Research in Child Development		USA	91	40	62	760		79% reported as European American at T1	2	62	1	0	1	0	13	3	9	0	mother-adolescent conflict (mothers' conflict reactions-disharmonious verbalizations)	the conflictual interaction, postconflict reports		3	more disharmonious verbal		combination of ego control and effortful control	2	greater control/regulation	> .78 (across subscales), no alpha for final composite score	1451	1	2	-0.05	2	-0.05	2	0	1	lower mother report control, more mothers' disharmonious verbal in reaction to conlifct	Table 9	p.115	1	-0.0500417	0.0169492
760	Eisenberg, Hofer, Spinrad, et al.	2008	Monographs of the Society for Research in Child Development		USA	91	40	62	760		79% reported as European American at T1	2	62	1	0	1	0	13	3	9	0	mother-adolescent conflict (mothers' conflict reactions-anger affect)	the conflictual interaction, postconflict reports		3	more anger affect		combination of ego control and effortful control	2	greater control/regulation	> .78 (across subscales), no alpha for final composite score	1452	1	2	-0.16	2	-0.16	2	0	1	lower mother report control, more mothers' anger affect in reaction to conlifct	Table 9	p.115	1	-0.161387	0.0169492
760	Eisenberg, Hofer, Spinrad, et al.	2008	Monographs of the Society for Research in Child Development		USA	91	40	62	760		79% reported as European American at T1	2	62	1	0	1	0	13	3	9	0	mother-adolescent conflict (mothers' conflict reactions-positive affect/verbal)	the conflictual interaction, postconflict reports		3	more positive affect/verbal		combination of ego control and effortful control	2	greater control/regulation	> .78 (across subscales), no alpha for final composite score	1453	1	2	0.1	1	-0.1	2	0	1	more mother report control, more mothers' positive affect/control in reaction to conlifct	Table 9	p.115	1	-0.100335	0.0169492
760	Eisenberg, Hofer, Spinrad, et al.	2008	Monographs of the Society for Research in Child Development		USA	91	40	62	760		79% reported as European American at T1	2	62	1	0	1	0	13	3	9	0	mother-adolescent conflict (mothers' conflict reactions-hostile verbal)	the conflictual interaction, postconflict reports		3	more hostile verbal		combination of ego control and effortful control	2	greater control/regulation	> .78 (across subscales), no alpha for final composite score	1454	1	2	-0.1	2	-0.1	2	0	1	lower teacher report control, more mothers' hostile verbal in reaction to conlifct	Table 9	p.115	1	-0.100335	0.0169492
760	Eisenberg, Hofer, Spinrad, et al.	2008	Monographs of the Society for Research in Child Development		USA	91	40	62	760		79% reported as European American at T1	2	62	1	0	1	0	13	3	9	0	mother-adolescent conflict (mothers' conflict reactions-disharmonious verbalizations)	the conflictual interaction, postconflict reports		3	more disharmonious verbal		combination of ego control and effortful control	2	greater control/regulation	> .78 (across subscales), no alpha for final composite score	1455	1	2	-0.04	2	-0.04	2	0	1	lower teacher report control, more mothers' disharmonious verbal in reaction to conlifct	Table 9	p.115	1	-0.0400214	0.0169492
760	Eisenberg, Hofer, Spinrad, et al.	2008	Monographs of the Society for Research in Child Development		USA	91	40	62	760		79% reported as European American at T1	2	62	1	0	1	0	13	3	9	0	mother-adolescent conflict (mothers' conflict reactions-anger affect)	the conflictual interaction, postconflict reports		3	more anger affect		combination of ego control and effortful control	2	greater control/regulation	> .78 (across subscales), no alpha for final composite score	1456	1	2	-0.13	2	-0.13	2	0	1	lower teacher report control, more mothers' anger affect in reaction to conlifct	Table 9	p.115	1	-0.13074	0.0169492
760	Eisenberg, Hofer, Spinrad, et al.	2008	Monographs of the Society for Research in Child Development		USA	91	40	62	760		79% reported as European American at T1	2	62	1	0	1	0	13	3	9	0	mother-adolescent conflict (mothers' conflict reactions-positive affect/verbal)	the conflictual interaction, postconflict reports		3	more positive affect/verbal		combination of ego control and effortful control	2	greater control/regulation	> .78 (across subscales), no alpha for final composite score	1457	1	2	0.14	1	-0.14	2	0	1	more teacher report control, more mothers' positive affect/control in reaction to conlifct	Table 9	p.115	1	-0.140926	0.0169492
760	Eisenberg, Hofer, Spinrad, et al.	2008	Monographs of the Society for Research in Child Development		USA	91	40	62	760		79% reported as European American at T1	2	62	1	0	1	0	13	3	9	0	mother-adolescent conflict (mothers' conflict reactions-hostile verbal)	the conflictual interaction, postconflict reports		3	more hostile verbal		combination of ego control and effortful control		greater control/regulation	.99 for interrater reliability	1458	1	2	-0.12	2	-0.12	2	0	1	lower observed report control, more mothers' hostile verbal in reaction to conlifct	Table 9	p.115	1	-0.120581	0.0169492
760	Eisenberg, Hofer, Spinrad, et al.	2008	Monographs of the Society for Research in Child Development		USA	91	40	62	760		79% reported as European American at T1	2	62	1	0	1	0	13	3	9	0	mother-adolescent conflict (mothers' conflict reactions-disharmonious verbalizations)	the conflictual interaction, postconflict reports		3	more disharmonious verbal		combination of ego control and effortful control		greater control/regulation	.99 for interrater reliability	1459	1	2	-0.1	2	-0.1	2	0	1	lower observed report control, more mothers' disharmonious verbal in reaction to conlifct	Table 9	p.115	1	-0.100335	0.0169492
760	Eisenberg, Hofer, Spinrad, et al.	2008	Monographs of the Society for Research in Child Development		USA	91	40	62	760		79% reported as European American at T1	2	62	1	0	1	0	13	3	9	0	mother-adolescent conflict (mothers' conflict reactions-anger affect)	the conflictual interaction, postconflict reports		3	more anger affect		combination of ego control and effortful control		greater control/regulation	.99 for interrater reliability	1460	1	2	-0.2	2	-0.2	2	0	1	lower observed report control, more mothers' anger affect in reaction to conlifct	Table 9	p.115	1	-0.202733	0.0169492
760	Eisenberg, Hofer, Spinrad, et al.	2008	Monographs of the Society for Research in Child Development		USA	91	40	62	760		79% reported as European American at T1	2	62	1	0	1	0	13	3	9	0	mother-adolescent conflict (mothers' conflict reactions-positive affect/verbal)	the conflictual interaction, postconflict reports		3	more positive affect/verbal		combination of ego control and effortful control		greater control/regulation	.99 for interrater reliability	1461	1	2	-0.04	1	0.04	2	0	1	more observed report control, LESS mothers' positive affect/control in reaction to conlifct	Table 9	p.115	1	0.0400214	0.0169492
763	Fosco, Caruthers, Dishion	2012	Journal of Family Psychology		USA	91	40	62	763		44% European American, 30% African American, 6% Latino, 4% Asian American, 2% Native American, 1% Pacific Islander, 12% multiracial, 1% other	1	792	1	0	1	0	17	7	49	0	adolescent report family conflict	The Family Conflcit Scale (Child & Family Center, 2001a, 2001b)		1	higher family conflict	0.75	effortful control	1	higher ec	.72 to .83	1465	3	1	-0.25	2	-0.25	1	1	0	more family conflict, less ec	Table 1	p.19	1	-0.255413	0.00126743
763	Fosco, Caruthers, Dishion	2012	Journal of Family Psychology	0	USA	91	40	62	763		44% European American, 30% African American, 6% Latino, 4% Asian American, 2% Native American, 1% Pacific Islander, 12% multiracial, 1% other	1	792	1	0	1	0	17	7	49	0	mother report family conflict	The Family Conflcit Scale (Child & Family Center, 2001a, 2001b)	poorer communication, including defensiveness, anger, and disrespect,	2	higher family conflict	0.74	effortful control	1	higher ec	.72 to .83	1466	3	1	-0.08	2	-0.08	2	0	1	more family conflict, less ec	Table 1	p.19	1	-0.0801713	0.00126743
763	Fosco, Caruthers, Dishion	2012	Journal of Family Psychology		USA	91	40	62	763		44% European American, 30% African American, 6% Latino, 4% Asian American, 2% Native American, 1% Pacific Islander, 12% multiracial, 1% other	1	792	1	0	1	0	17	7	49	0	father report family conflict	The Family Conflcit Scale (Child & Family Center, 2001a, 2001b)		2	higher family conflict	0.68	effortful control	1	higher ec	.72 to .83	1467	3	1	-0.11	2	-0.11	2	0	1	more family conflict, less ec	Table 1	p.19	1	-0.110447	0.00126743
788	Park & Kim	2012	JOURNAL OF CLINICAL PSYCHOLOGY	0	USA	91	40	62	1005	cross-sectional study on Korean American Youths	All were Korean American	4	166	1	0	1	0	13	3	9	0	family conflict	Asian American Family Conflicts Scale (FCS; Lee, Choe, Kim, & Ngo, 2000)	the intensity of conﬂict between adolescents and their mothers and fathers, respectively	1	more conflict	0.96	anger control	1	better anger control	0.87	1504	3	1	-0.08	2	-0.08	1	1	0	more family conflict less anger control	1	1346	1	-0.0801713	0.00613497
789	Patouris, Scaife & Nobes	2016	Journal of Substance Use	0	UK	89	35	66	789				199	1	0	1	0	16.44	6.44	41.4736	0	coercion	PSCQ (Skinner et al., 1986).	Coercion	1	more coercion	0.87	urgency	1	better urgency	0.87	1512	3	1	-0.284	2	-0.284	1	1	0	more negative less urgency	2	510	1	-0.292028	0.00510204
789	Patouris, Scaife & Nobes	2016	Journal of Substance Use		UK	89	35	66	789				199	1	0	1	0	16.44	6.44	41.4736	0	coercion	PSCQ (Skinner et al., 1986).	Coercion	1	more coercion	0.87	sensation seeking	1	more impulsivity	0.87	1518	3	1	0.038	1	-0.038	1	1	0	more negative more impulsiveness	2	510	1	-0.0380183	0.00510204
789	Patouris, Scaife & Nobes	2016	Journal of Substance Use		UK	89	35	66	789				199	1	0	1	0	16.44	6.44	41.4736	0	coercion	PSCQ (Skinner et al., 1986).	Coercion	1	more coercion	0.87	lack of premeditation	1	more impulsivity	0.87	1524	3	1	0.184	1	-0.184	1	1	0	more negative more impulsiveness	2	510	1	-0.18612	0.00510204
789	Patouris, Scaife & Nobes	2016	Journal of Substance Use		UK	89	35	66	789				199	1	0	1	0	16.44	6.44	41.4736	0	coercion	PSCQ (Skinner et al., 1986).	Coercion	1	more coercion	0.87	lack of perseverence	1	more impulsivity	0.87	1530	3	1	0.14	1	-0.14	1	1	0	more negative more impulsiveness	2	510	1	-0.140926	0.00510204
9999	Schofield, Conger & Conger	2017	Development and Psychopathology	0	USA	91	40	62	9999	Family Transitions Project	100% European American	2	558	1	0	1	0					harsh parenting	hostility, angry coercion, physical attacks, antisocial behavior	consists of coercion, physical attacks and hostility	3	more hostility	0.91	self-control	2	more self-control		9991	1	3	-0.25	2	-0.25	2	0	1	more harshness less self-control	1	1283	1	-0.255413	0.0018018
9991	Beckmann	2017	Journal of Interpersonal Violence	0	Germany	67	35	66	9991	school surveys Lower Saxony	1/4 migration background	2	6429	1	0	1	0	14.88	4.88	23.8144	0	parent-to-child physical abuse	Parent-child Conflict tactics Scale (Straus et al. 1998)	Physical abuse	1	more abuse	0.85	self-control	1	more self-control	0.86	9992	3	2	-0.12	2	-0.12	1	1	0	more abuse less self-control	2	14	1	-0.120581	0.000155618
9991	Beckmann	2017	Journal of Interpersonal Violence		Germany	67	35	66	9991	school surveys Lower Saxony	1/4 migration background	2	6429	1	0	1	0	14.88	4.88	23.8144	0	parent-to-child verbar abuse	Parent-child Conflict tactics Scale (Straus et al. 1998)	Verbal abuse	1	more abuse	0.79	self-control	1	more self-control	0.86	9993	3	2	-0.113	2	-0.113	1	1	0	more abuse less self-control	2	14	1	-0.113485	0.000155618
9991	Beckmann	2017	Journal of Interpersonal Violence		Germany	67	35	66	9991	school surveys Lower Saxony	1/4 migration background	2	6429	1	0	1	0	14.88	4.88	23.8144	0	parent-to-child physical abuse	Parent-child Conflict tactics Scale (Straus et al. 1998)	Physical abuse	1	more abuse	0.85	self-control	1	more self-control	0.86	9994	3	3	-0.183	2	-0.183	1	1	0	more abuse less self-control	2	14	1	-0.185085	0.000155618
9991	Beckmann	2017	Journal of Interpersonal Violence		Germany	67	35	66	9991	school surveys Lower Saxony	1/4 migration background	2	6429	1	0	1	0	14.88	4.88	23.8144	0	parent-to-child verbar abuse	Parent-child Conflict tactics Scale (Straus et al. 1998)	Verbal abuse	1	more abuse	0.79	self-control	1	more self-control	0.86	9995	3	3	-0.178	2	-0.178	1	1	0	more abuse less self-control	2	14	1	-0.179916	0.000155618

## Sheet: New articles
9999	schofield	Disrupting intergenerational continuity in harsh parenting: Self-control and a supportive partner
9991	Beckmann	Risk and Protective Factors of Child-to-Parent Violence: A Comparison Between Physical and Verbal Aggression
